# Supplementary material
Source: MDPI journal article supplement (https://www.mdpi.com/2073-4433/13/2/265)
Supplement: s1 [file s1 › atmosphere-1537440-supplementary.pdf]

# Outdoor Atmospheric Microplastics within the Humber Region (United Kingdom): Quantification and Chemical Characterisation of Deposited Particles Present

Lauren C. Jenner, Laura R. Sadofsky, Evangelos Danopoulos, Emma Chapman, David White, Rebecca L. Jenkins and Jeanette M. Rotchell

**Methods 1.** SM1 Calculation used to determine the LOD/LOQ for each MP polymer.

|                                                              |                    |
|--------------------------------------------------------------|--------------------|
| [A] = MP polymer quantity in analysed proportion of a sample | A = 2              |
| [B] = MP polymer quantity in whole sample([A]*8) **          | B = 16 (2*8)       |
| [C] = Mean MP polymer quantity in blanks                     | C = 0.2±0.4        |
| [D] = Blank correction ([B]-[C])                             | D = 15.80 (16-0.2) |
| [LOD] = 3*SD of [C] or 1.1 (whichever value is higher)       | [LOD] = 1.2(3*0.4) |
| [LOQ] = 10* SD of [C] or 3.3 (whichever value is higher)     | [LOQ] = 4 (10*0.4) |

Blank corrected results above the LOQ will be included in final concentrations: [D] > LOQ included in results

\*\* For the two samples in which one quarter of the Anodisc was analysed by FTIR = ([A]\*16).

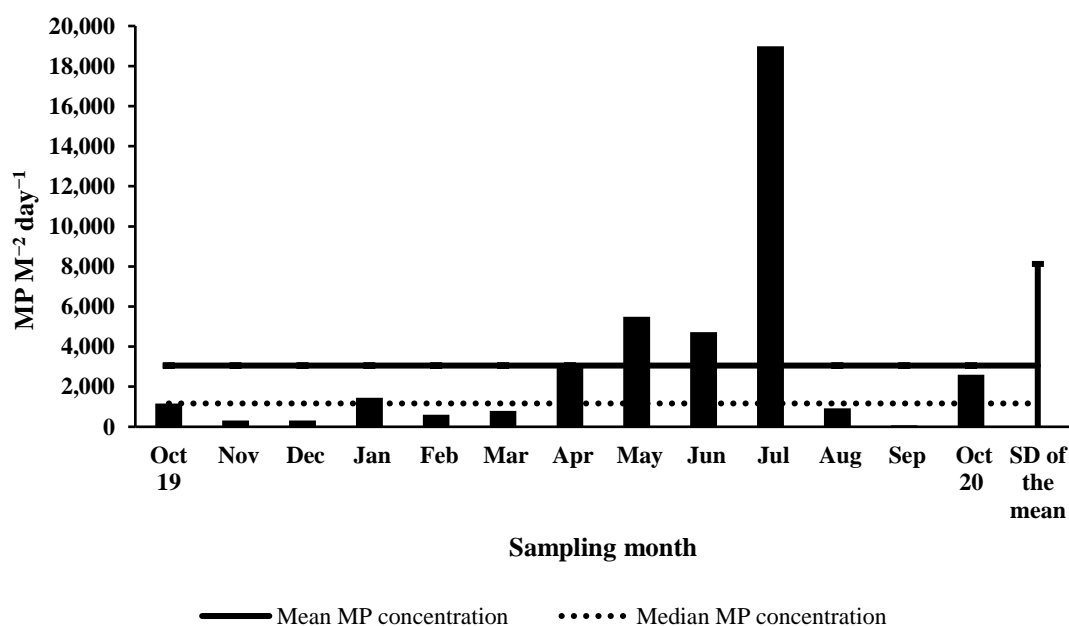

**Figure S1.** Chart showing the MP levels (MP m<sup>-2</sup> day<sup>-1</sup>) during each 2-week sampling period per month, for the 13-month investigation of Site 1. The solid bar indicates the mean value. Dotted line indicates the median value. April and May coincided with an official SARS-CoV lockdown.

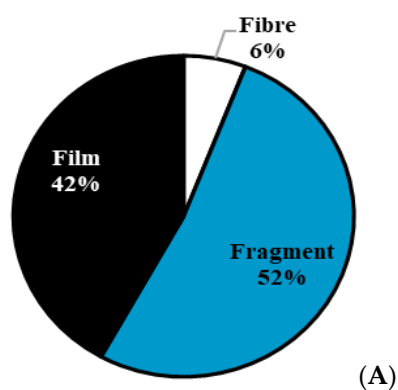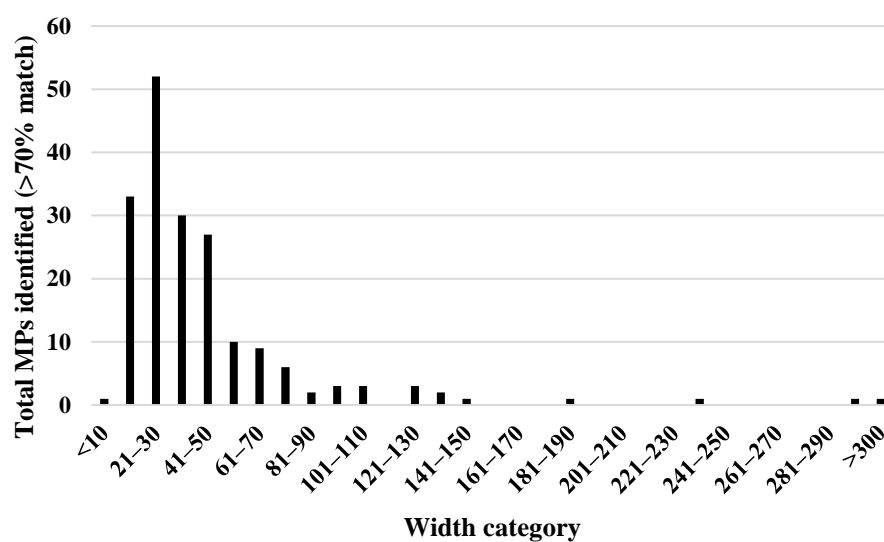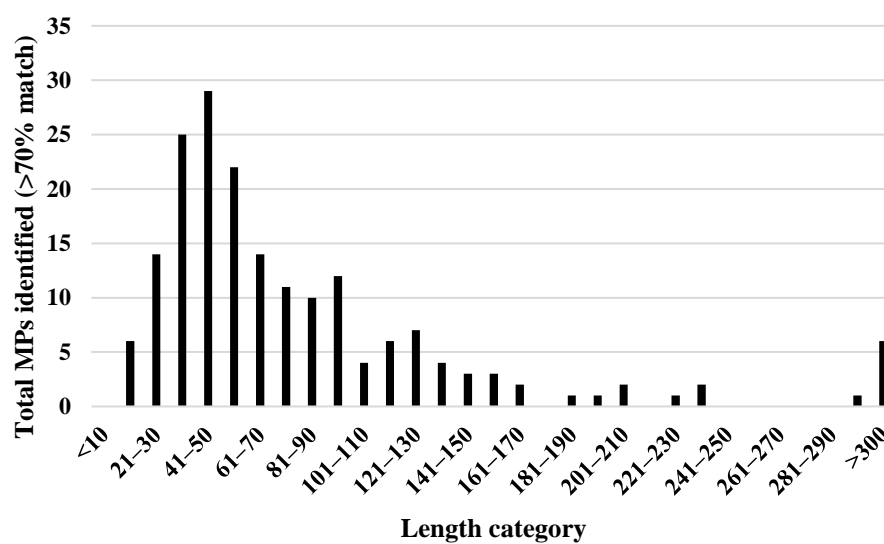

**Figure S2.** MP characteristics observed in the atmospheric samples obtained from all sites, from a single 2-week sampling period. (A) shape, (B) length, and (C), width.

**Table S1.** The background level of MPs detected within procedural and laboratory blanks for the 13-month sampling at Site 1 and the 2-week investigation of 5 sampling sites. No MPs were detected in any of the 5 field blanks.

| Procedural blanks   | MPs identified | MP polymer type |
|---------------------|----------------|-----------------|
| 1 (Site 1)          | 6              | Nylon (2)       |
|                     |                | PET (1)         |
|                     |                | PP/ PE (1)      |
|                     |                | PS (1)          |
|                     |                | Resin (1)       |
| 2 (Site 1)          | 1              | PE (1)          |
| 3 (Site 2, 3, 4, 5) | 4              | PES (1)         |
|                     |                | PET (1)         |
|                     |                | PP (1)          |
|                     |                | TPE (1)         |
| 4 (Site 2, 3, 4, 5) | 1              | PES (1)         |
| Laboratory blanks   | MPs identified | MP polymer type |
| Site 1 Oct-19       | 0              | -               |
| Site 1 Nov          | 0              | -               |
| Site 1 Dec          | 0              | -               |
| Site 1 Jan          | 4              | PP/ PE (1)      |
|                     |                | PPA (1)         |
|                     |                | PVP (2)         |
| Site 1 Feb          | 0              | -               |
| Site 1 Mar          | 4              | Co-polymer (1)  |
|                     |                | Nylon (3)       |
| Site 1 Apr          | 6              | Nylon (1)       |
|                     |                | PS (4)          |
|                     |                | PP/ PE (1)      |
| Site 1 May          | 1              | Co-polymer (1)  |
| Site 1 Jun          | 5              | Co-polymer (1)  |
|                     |                | PPA (1)         |
|                     |                | PS (2)          |
|                     |                | PVC (1)         |
| Site 1 Jul          | 1              | PP/ PE          |
| Site 1 Aug          | 0              | -               |
| Site 1 Sep          | 0              | -               |
| Site 1 Oct-20       | 0              | -               |
| Site 2 Feb          | 0              | -               |
| Site 3 Feb          | 1              | Nylon (1)       |
| Site 4 Feb          | 0              | -               |
| Site 5 Feb          | 5              | PES (1)         |
|                     |                | PET (1)         |
|                     |                | PP (2)          |
|                     |                | TPE (1)         |
